# Supplementary material
Source: HighWire-hosted journal article supplement (http://www.cmaj.ca/highwire/filestream/59799/field_highwire_adjunct_files/0/151417-case-1-at.pdf)
Supplement: 151417-case-1-at.pdf [file 151417-case-1-at.pdf]

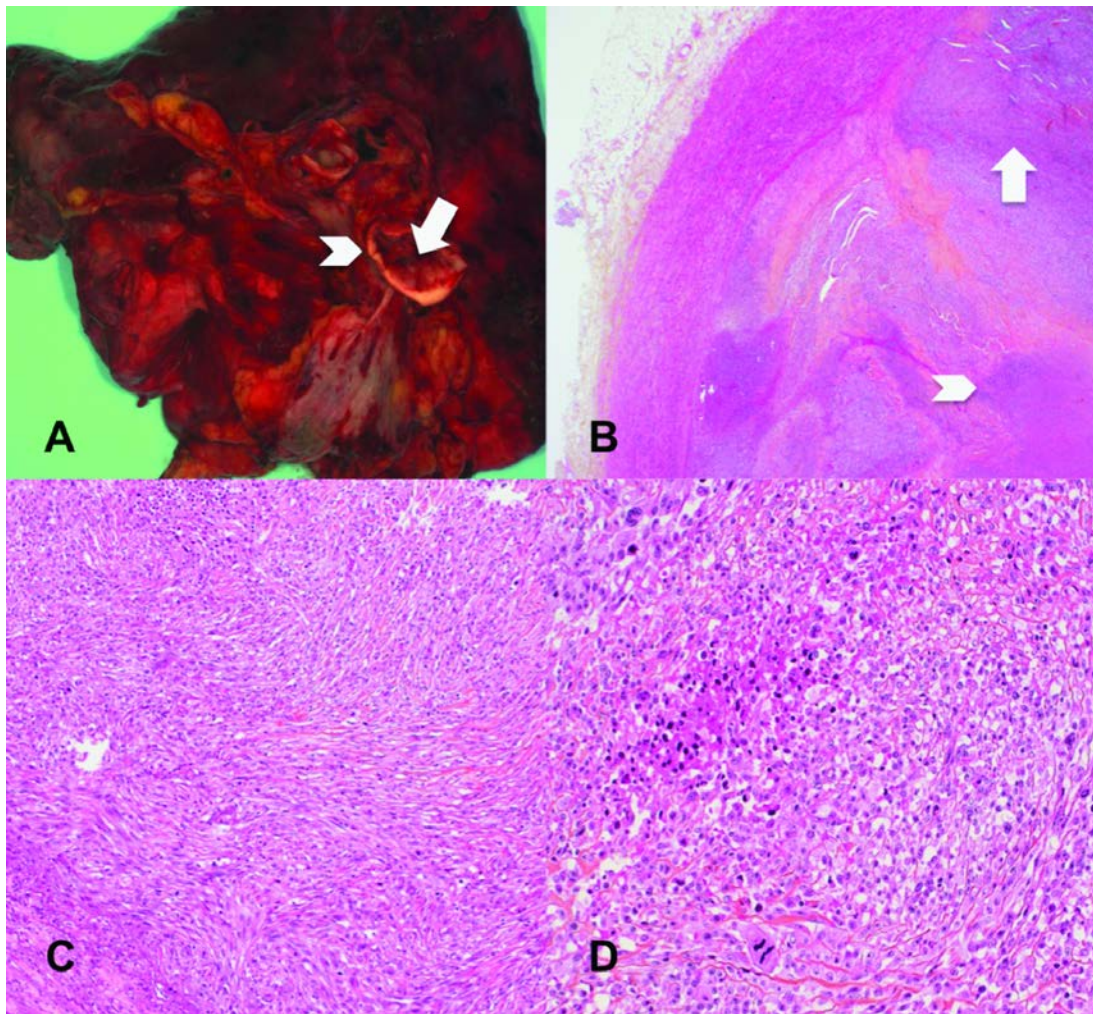

Appendix 1: Gross and histologic examination of the tumoral mass in the pulmonary artery. (A) Hilar view of the left lung showing the intravascular tumour (arrow) within the left pulmonary artery (arrow head). Figure 4: (A) Hilar view of the left lung showing the intravascular tumour (arrow) within the left pulmonary artery (arrow head). (B–D) Histopathologic examination of biopsy specimens of angiosarcoma with hematoxylin and eosin staining, showing (B) vascular wall with zones of hypercellularity (arrow) and necrosis (arrow head) (magnification  $\times 20$ ), (C) fusiform cell bundles (magnification  $\times 100$ ) and (D) atypical cells and mitoses (magnification  $\times 200$ ).
